# Supplementary material for: Ligand-controlled formation of covalently modified antimoniomolybdates and their photochromic properties
Source: Royal Society of Chemistry journal article supplement (doi:10.1039/c6ce02343f), 2016-11-30
Supplement: c6ce02343f1.pdf [file c6ce02343f1.pdf]

## Ligand-controlled formation of covalently modified antimoniomolybdates and photochromic properties

Jin Wang, Yanfen Liang, Pengtao Ma, Dongdi Zhang, Jingyang Niu and Jingping Wang

Henan Key Laboratory of Polyoxometalate Chemistry, Institute of Molecular and Crystal Engineering, College of Chemistry and Chemical Engineering, Henan University, Kaifeng 475004, Henan, China.

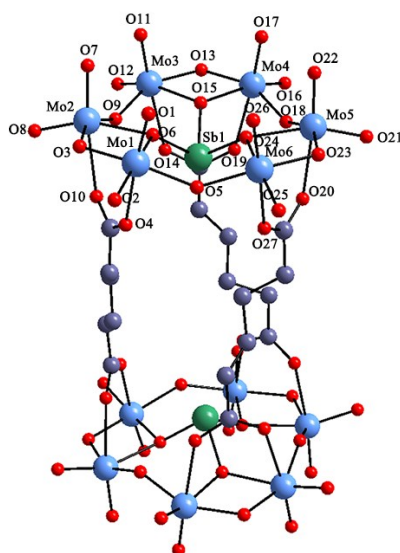

| Bond        | Bond length | Bond Valence | Valence Sum                  |
|-------------|-------------|--------------|------------------------------|
| Sb(1)-O(6)  | 1.945(4)    | 1.079        | $\Sigma(\text{Sb1}) = 3.191$ |
| Sb(1)-O(15) | 1.952(3)    | 1.059        |                              |
| Sb(1)-O(24) | 1.954(4)    | 1.053        |                              |

| Bond       | Bond length | Bond Valence | Valence Sum                  |
|------------|-------------|--------------|------------------------------|
| Mo(1)-O(1) | 1.701(4)    | 1.744        | $\Sigma(\text{Mo1}) = 6.306$ |
| Mo(1)-O(2) | 1.718(4)    | 1.666        |                              |
| Mo(1)-O(3) | 1.892(4)    | 1.041        |                              |
| Mo(1)-O(5) | 1.930(4)    | 0.939        |                              |
| Mo(1)-O(6) | 2.134(4)    | 0.541        |                              |
| Mo(1)-O(4) | 2.270(4)    | 0.375        |                              |

| Bond        | Bond length | Bond Valence | Valence Sum                  |
|-------------|-------------|--------------|------------------------------|
| Mo(2)-O(7)  | 1.701(4)    | 1.744        | $\Sigma(\text{Mo2}) = 6.172$ |
| Mo(2)-O(8)  | 1.710(4)    | 1.702        |                              |
| Mo(2)-O(9)  | 1.897(4)    | 1.027        |                              |
| Mo(2)-O(3)  | 1.952(4)    | 0.885        |                              |
| Mo(2)-O(6)  | 2.135(4)    | 0.540        |                              |
| Mo(2)-O(10) | 2.386(4)    | 0.274        |                              |

| Bond        | Bond length | Bond Valence | Valence Sum                  |
|-------------|-------------|--------------|------------------------------|
| Mo(3)-O(12) | 1.694(4)    | 1.777        | $\Sigma(\text{Mo3}) = 6.292$ |
| Mo(3)-O(11) | 1.701(4)    | 1.744        |                              |
| Mo(3)-O(9)  | 1.907(4)    | 0.999        |                              |
| Mo(3)-O(13) | 1.945(4)    | 0.902        |                              |
| Mo(3)-O(15) | 2.152(4)    | 0.515        |                              |
| Mo(3)-O(14) | 2.290(4)    | 0.355        |                              |

| Bond        | Bond length | Bond Valence | Valence Sum                  |
|-------------|-------------|--------------|------------------------------|
| Mo(4)-O(17) | 1.704(4)    | 1.730        | $\Sigma(\text{Mo4}) = 6.266$ |
| Mo(4)-O(16) | 1.709(4)    | 1.707        |                              |
| Mo(4)-O(13) | 1.915(4)    | 0.978        |                              |
| Mo(4)-O(18) | 1.922(4)    | 0.960        |                              |
| Mo(4)-O(15) | 2.151(4)    | 0.517        |                              |
| Mo(4)-O(19) | 2.271(4)    | 0.374        |                              |

| Bond        | Bond length | Bond Valence | Valence Sum                  |
|-------------|-------------|--------------|------------------------------|
| Mo(5)-O(22) | 1.688(4)    | 1.806        | $\Sigma(\text{Mo5}) = 6.230$ |
| Mo(5)-O(21) | 1.725(5)    | 1.634        |                              |
| Mo(5)-O(18) | 1.904(4)    | 1.008        |                              |
| Mo(5)-O(23) | 1.940(4)    | 0.914        |                              |
| Mo(5)-O(24) | 2.151(4)    | 0.517        |                              |
| Mo(5)-O(20) | 2.294(4)    | 0.351        |                              |

| Bond        | Bond length | Bond Valence | Valence Sum                  |
|-------------|-------------|--------------|------------------------------|
| Mo(6)-O(25) | 1.697(4)    | 1.763        | $\Sigma(\text{Mo6}) = 6.238$ |
| Mo(6)-O(26) | 1.709(5)    | 1.706        |                              |
| Mo(6)-O(5)  | 1.908(4)    | 0.997        |                              |
| Mo(6)-O(23) | 1.947(4)    | 0.897        |                              |
| Mo(6)-O(24) | 2.136(4)    | 0.538        |                              |
| Mo(6)-O(27) | 2.309(4)    | 0.337        |                              |

**Table S1** Bond valence sum parameters for the Sb and Mo atoms in **1**. The bond valence sum parameters for the Sb and Mo atoms in **2–4** are almost the same as **1**, so they are omitted.

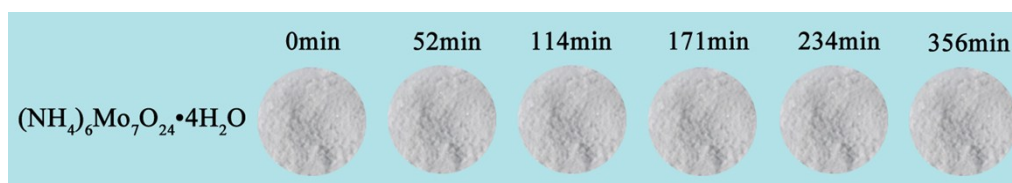

**Fig. S1** Color variations of  $(\text{NH}_4)_6\text{Mo}_7\text{O}_{24}\cdot 4\text{H}_2\text{O}$  at different time (in min) under the irradiation of xenon lamp.

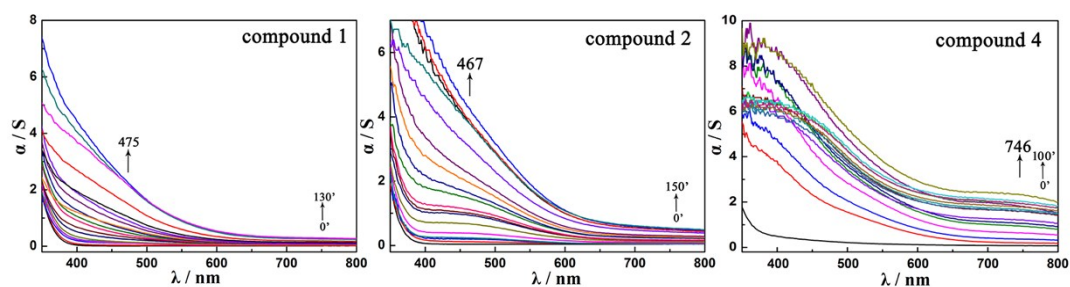

**Fig. S2** Evolution of the Kubelka-Munk transformed reflectivity of compounds **1**, **2**, **4** vs wavelength for different irradiation durations during the coloration process.

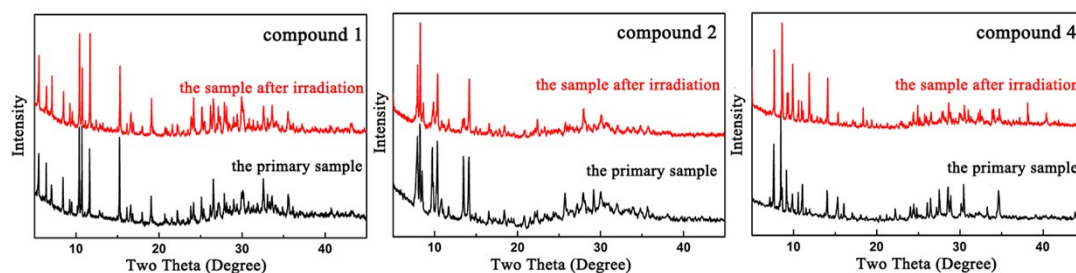

**Fig. S3** The XRPD of compounds **1**, **2**, **4** before and after irradiation.

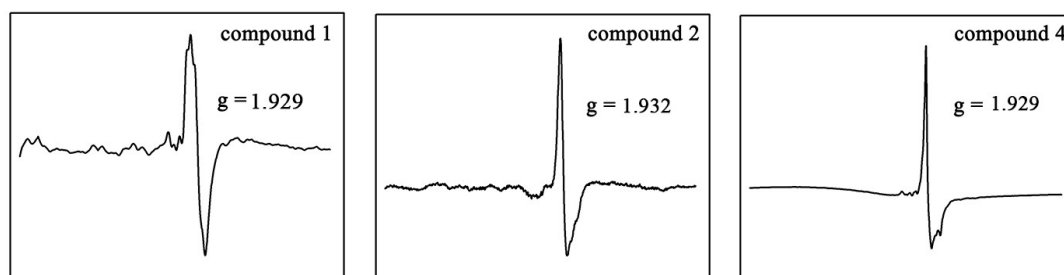

**Fig. S4** EPR for compounds **1**, **2** and **4** after being irradiated for 120 min.

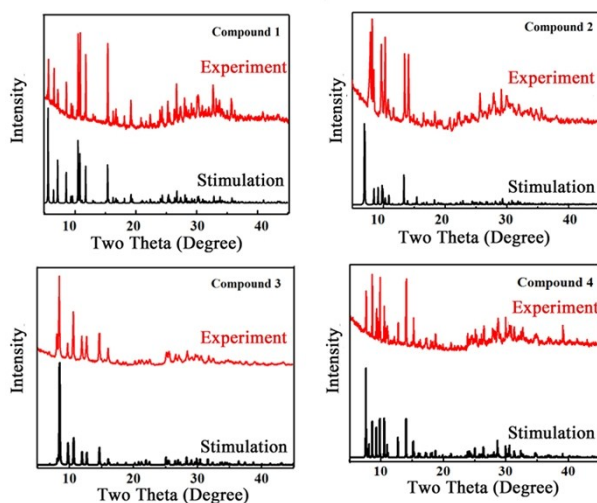

**Fig. S5** X-ray powder diffraction patterns of compounds **1–4**. Black: the calculated patterns based on the single crystal X-ray diffraction data; Red: the experimental XPRD patterns for the samples.

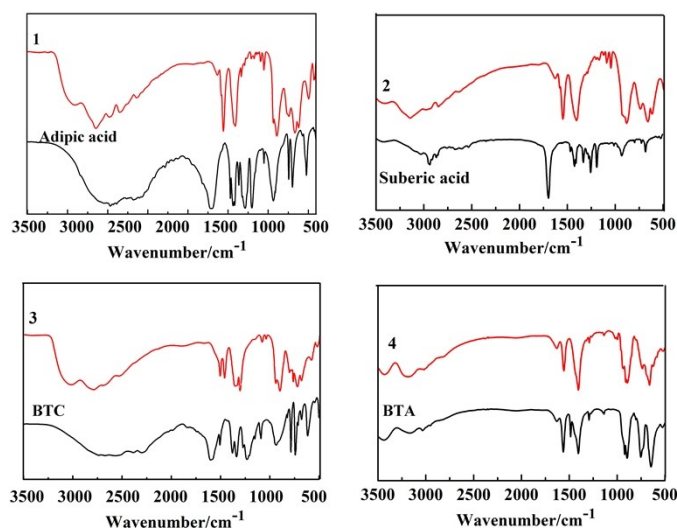

**Fig. S6** IR spectra of compounds **1-4** and the corresponding carboxylic acids. Red: compounds **1-4**;  
Black: carboxylic acids.

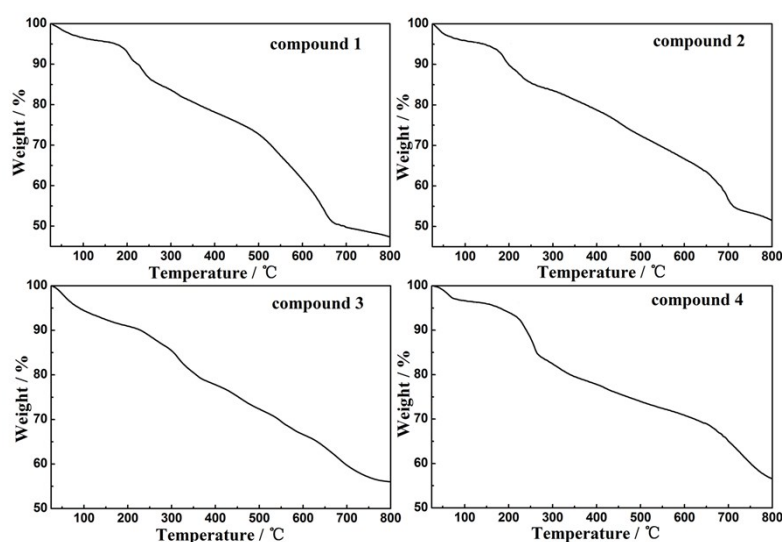

**Fig. S7** TG curves of **1-4**.

### Thermogravimetric analyses

The thermal decomposition processes of compounds **1**, **2** and **4** are similar (Fig. S5). The processes can be divided into two steps. The first weight losses of 4.35% (calc.4.23%) from 25 to 159 °C for **1**, 4.78% (calc.4.80%) from 25 to 140 °C for **2** and 3.85% (calc.3.74%) from 25 to 148 °C for **4** are assigned to the evaporation of seven, eight and three lattice water molecules respectively. The second weight losses between 159–800 °C for **1**, 140–800 °C for **2** are attributed to the release of dehydration protons, NH<sub>3</sub> molecules, imidazole molecules, multicarboxylic acid ligands and the sublimation of part of the metal oxides. While the second weight loss between 148–800 °C for compound **4** arises from the loss of six NH<sub>3</sub> molecules, one benzene-1,3,5-triacetic acid ligand and the sublimation of part of the metal oxides.

For compound **3** (Fig. S5), the TG curve shows a gradual decomposition giving a total

loss of 43.80% in the range of 25–800 °C, which can be attributed to the removal of eight lattice water molecules, twenty-four NH<sub>3</sub> molecules, four 1,3,5-benzenetricarboxylic acids and the sublimation of part of the metal oxides.

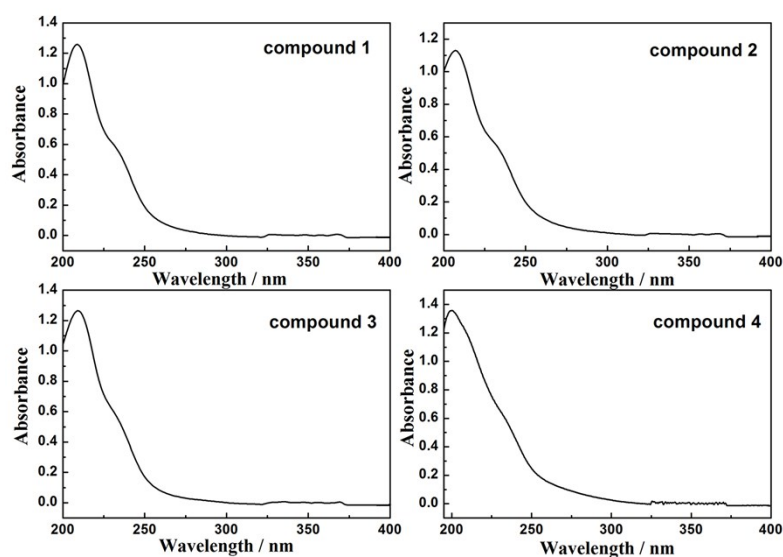

**Fig. S8** UV spectra of compounds **1–4**.

#### UV Spectra.

UV spectra of compounds **1–4** in aqueous solution are shown in Fig. S6. The spectra are similar for **1–4** in the region 200–400 nm. They represent two characteristic peaks: the strong absorption bands centered at 208 nm for **1**, 207 nm for **2**, 209 nm for **3** and 200 nm for **4** are attributed to the  $p\pi-d\pi$  charge-transfer transitions of the  $O_t \rightarrow Mo$  bonds.<sup>S1</sup> The weak absorption bands at about 234 nm for **1–4** are assigned to the  $p\pi-d\pi$  charge-transfer transitions of the  $O_{b,c} \rightarrow Mo$  bonds.<sup>S1</sup>

S1 J. Y. Niu, J. A. Hua, X. Ma and J. P. Wang, *CrystEngComm*, 2012, **14**, 4060.
